# Supplementary material for: Phylogeography of the Crown-of-Thorns Starfish in the Indian Ocean
Source: PubMed Central journal article supplement (PMC3424128; doi:10.1371/journal.pone.0043499), 2012-08-21

**Figure S3.**

**(a) Northern Indian Ocean**

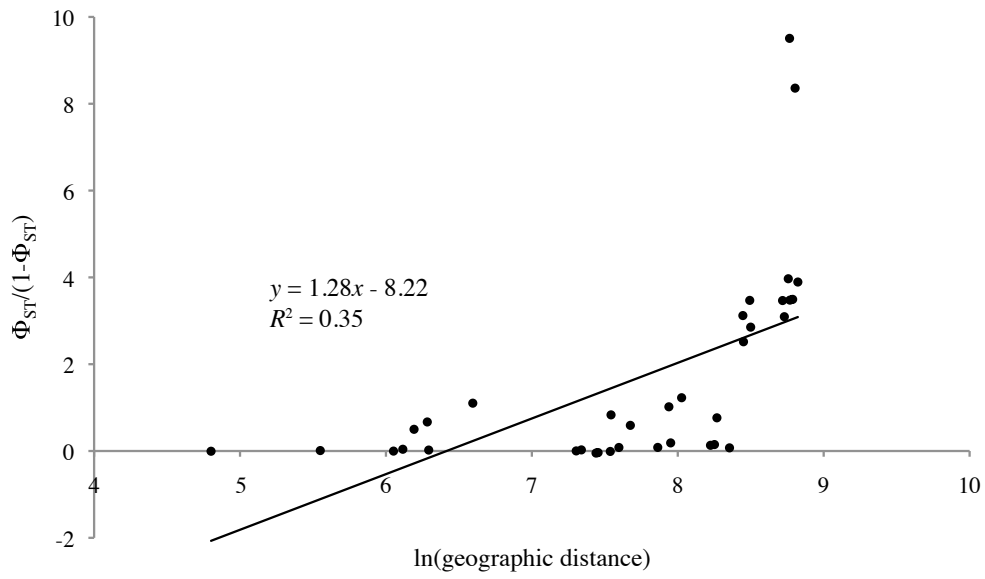

**(b) Southern Indian Ocean**

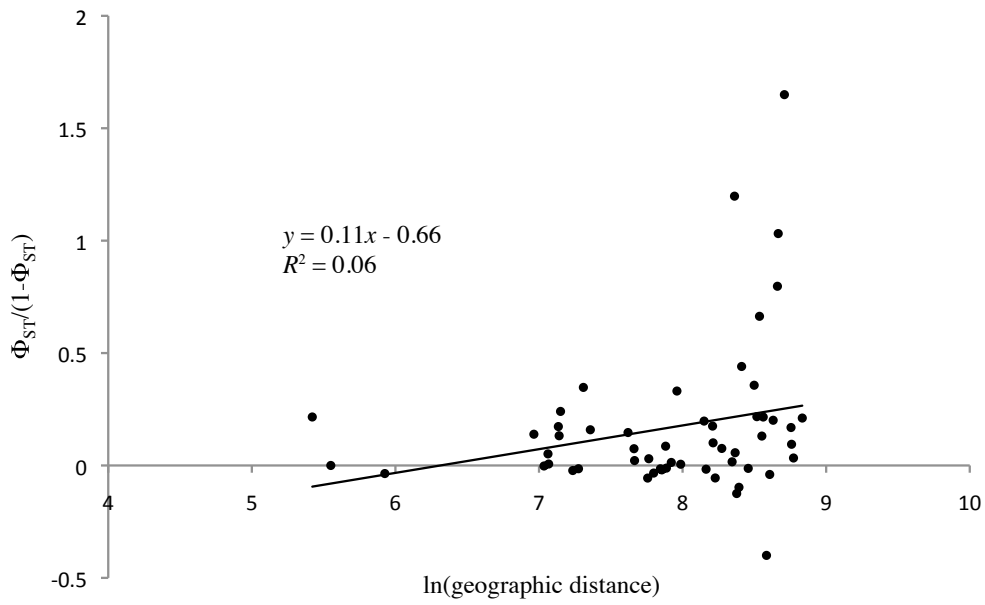

Supplement: pone.0043499.s003.pdf [file pone.0043499.s003.pdf]
