# Supplementary material for: Phylogeography of the Crown-of-Thorns Starfish in the Indian Ocean
Source: PubMed Central journal article supplement (PMC3424128; doi:10.1371/journal.pone.0043499), 2012-08-21

**Figure S4.**

(a) Southwest Monsoon: July Mean (1993-2009) Ocean Surface Currents (meter/sec)

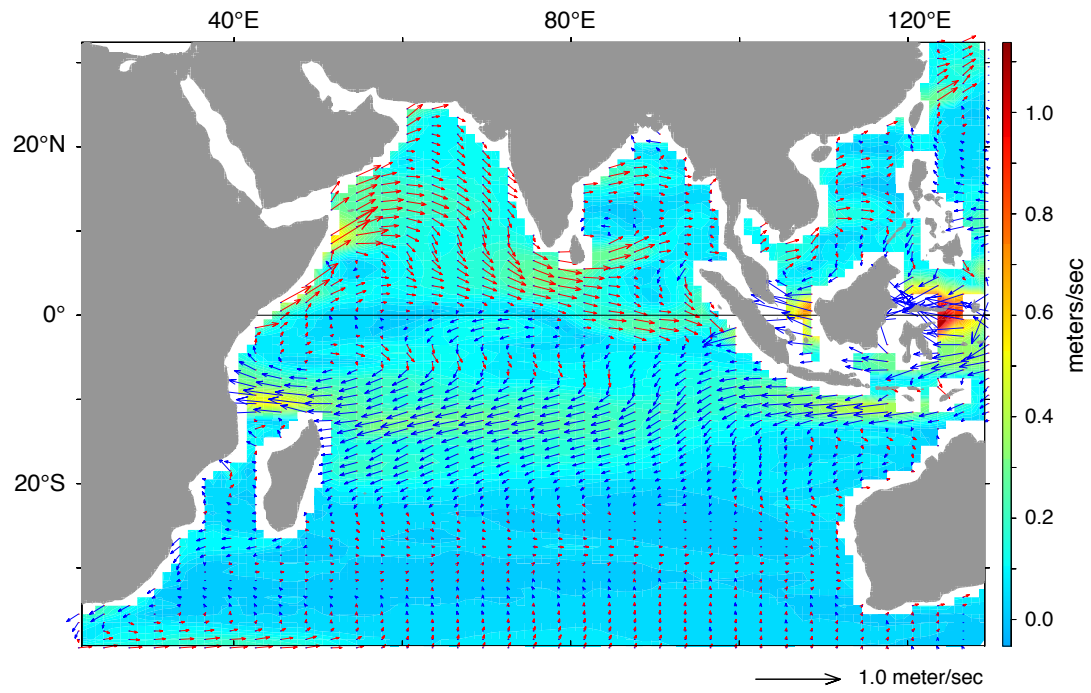

(b) Northeast Monsoon: January Mean (1993-2009) Ocean Surface Currents (meter/sec)

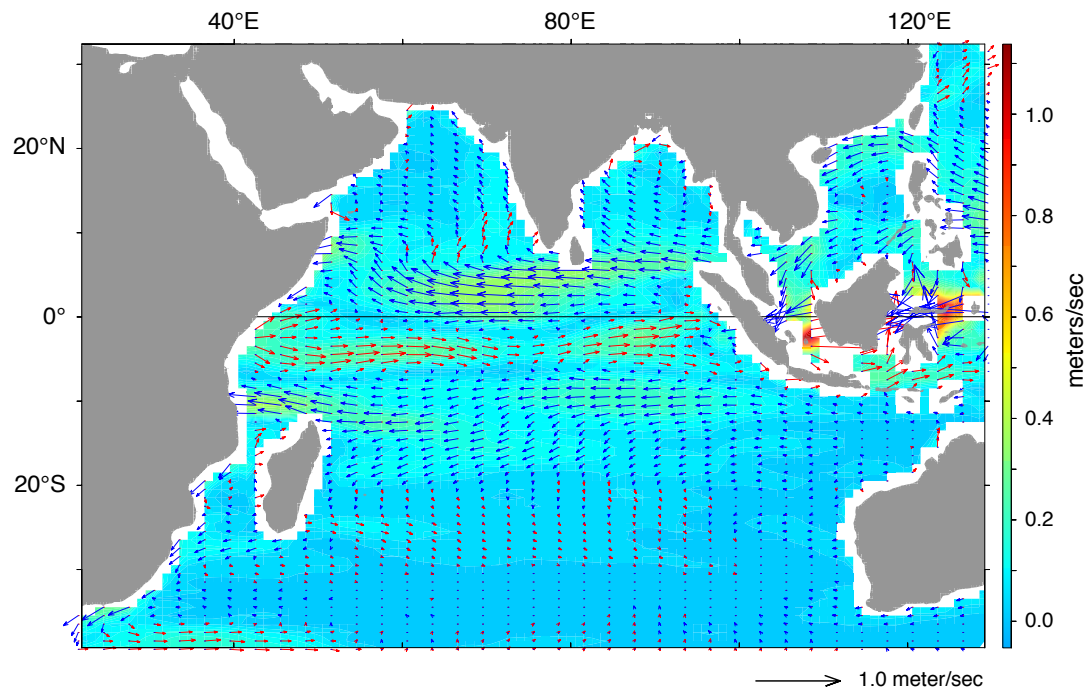

Supplement: pone.0043499.s004.pdf [file pone.0043499.s004.pdf]
