# Supplementary material for: Phylogeography of the Crown-of-Thorns Starfish in the Indian Ocean
Source: PubMed Central journal article supplement (PMC3424128; doi:10.1371/journal.pone.0043499), 2012-08-21
Supplement: pone.0043499.s006.pdf [file pone.0043499.s006.pdf]

**Table S1.**

| Location                     | Latitude | Longitude | Sampled by / reference        | $n_{CR}$  | EMBL CR      | $n_{COI}$ | EMBL COI     |
|------------------------------|----------|-----------|-------------------------------|-----------|--------------|-----------|--------------|
| <b>Southern Indian Ocean</b> |          |           |                               | <b>95</b> |              | <b>57</b> |              |
| *UAE                         | 25.323   | 56.382    | G. Kirkwood, C. Vogler        | 2         | HE608371-72  | 2         | FM174593-94  |
| *Oman                        | 23.828   | 58.143    | C. Vogler                     | 2         | HE608373-74  | 2         | FM174595-96  |
| Réunion                      | -21.115  | 55.536    | S. Uthicke                    | 5         | HE608326-30  | 5         | FM174629-33  |
| Mauritius                    | -20.348  | 57.552    | Benzie 1999                   | 4         | HE608355-58  | 4         | FM174634-38  |
| Kenya                        | -4.053   | 39.673    | C. Vogler                     | 24        | HE608331-54  | 23        | FM174597-619 |
| South Africa                 | -27.915  | 32.564    | Benzie 1999                   | 12        | HE608359-70  | 9         | FM174620-28  |
| Mayotte                      | -12.724  | 45.149    | K. Gérard                     | 21        | HE608375-95  | -         | -            |
| Nth Madagascar               | -12.891  | 48.604    | K. Gérard                     | 11        | HE608396-406 | -         | -            |
| Sth Madagascar               | -22.075  | 43.242    | C. Sheppard                   | 2         | HE608407-08  | -         | -            |
| Chagos                       | -6.638   | 71.314    | C. Sheppard                   | 6         | HE608409-14  | 6         | HE608510-15  |
| Cocos Keeling Islands        | -12.164  | 96.871    | L. Illidge-Evans, Benzie 1999 | 6         | HE608320-25  | 6         | FM174639-44  |
| <b>Northern Indian Ocean</b> |          |           |                               | <b>95</b> |              | <b>48</b> |              |
| *UAE                         | 25.323   | 56.382    | G. Kirkwood, C. Vogler        | 15        | HE608415-29  | 10        | FM174574-83  |
| *Oman                        | 23.828   | 58.143    | C. Vogler                     | 9         | HE608430-38  | 9         | FM174584-92  |
| Maldives                     | 3.203    | 73.221    | Benzie 1999                   | 17        | HE608439-55  | 13        | FM174561-73  |
| Christmas Island             | -10.447  | 105.690   | L. Illidge-Evans              | 3         | HE608487-89  | 3         | FM174547-49  |
| Aceh                         | 3.954    | 96.649    | P. Barber                     | 15        | HE608472-86  | -         | -            |
| Thailand                     | 7.580    | 98.522    | Benzie 1999                   | 16        | HE608456-71  | 11        | FM174550-60  |
| #Pulau Seribu                | -5.711   | 106.597   | Benzie 1999, P. Barber        | 12        | HE608490-501 | 2         | FM174545-46  |
| #Karimunjawa                 | -5.835   | 110.439   | P. Barber                     | 5         | HE608505-09  | -         | -            |
| #Krakatau                    | -6.047   | 105.549   | P. Barber                     | 3         | HE608502-04  | -         | -            |
