# Supplementary material for: Phylogeography of the Crown-of-Thorns Starfish in the Indian Ocean
Source: PubMed Central journal article supplement (PMC3424128; doi:10.1371/journal.pone.0043499), 2012-08-21
Supplement: pone.0043499.s009.pdf [file pone.0043499.s009.pdf]

**Table S4.****(a) Northern Indian Ocean**

|                  | UAE          | Oman         | Maldives     | Thailand | Aceh         | XmasIs | Seribu | Krakatau |
|------------------|--------------|--------------|--------------|----------|--------------|--------|--------|----------|
| Oman             | 0.010        |              |              |          |              |        |        |          |
| Maldives         | <b>0.551</b> | <b>0.505</b> |              |          |              |        |        |          |
| Thailand         | <b>0.776</b> | <b>0.757</b> | <b>0.157</b> |          |              |        |        |          |
| Aceh             | <b>0.741</b> | <b>0.716</b> | 0.077        | 0.039    |              |        |        |          |
| Christmas Island | <b>0.893</b> | 0.905        | 0.433        | 0.372    | <b>0.454</b> |        |        |          |
| Seribu           | <b>0.777</b> | <b>0.756</b> | 0.129        | -0.037   | 0.025        | 0.401  |        |          |
| Krakatau         | <b>0.799</b> | 0.776        | 0.116        | -0.050   | 0.002        | 0.333  | -0.005 |          |
| Karimunjawa      | <b>0.796</b> | <b>0.777</b> | 0.068        | 0.075    | -0.010       | 0.524  | -0.002 | 0.021    |

Values in bold were significant after Bonferroni correction:  $p < 0.00139$ .

**(b) Southern Indian Ocean**

|               | UAE    | Oman   | Chagos | CocosIs | SthAfrica | Kenya  | Mauritius | Reunion | Mayotte | NthMadagascar |
|---------------|--------|--------|--------|---------|-----------|--------|-----------|---------|---------|---------------|
| Oman          | 0.000  |        |        |         |           |        |           |         |         |               |
| Chagos        | 0.070  | 0.149  |        |         |           |        |           |         |         |               |
| CocosIs       | 0.623  | 0.508  | 0.249  |         |           |        |           |         |         |               |
| SthAfrica     | 0.032  | 0.086  | -0.013 | 0.174   |           |        |           |         |         |               |
| Kenya         | -0.059 | 0.091  | -0.017 | 0.144   | 0.013     |        |           |         |         |               |
| Mauritius     | 0.399  | 0.263  | 0.069  | 0.545   | -0.012    | 0.079  |           |         |         |               |
| Reunion       | 0.116  | 0.178  | -0.059 | 0.306   | -0.035    | -0.015 | 0.177     |         |         |               |
| Mayotte       | -0.108 | 0.054  | 0.005  | 0.167   | 0.021     | -0.002 | 0.137     | -0.015  |         |               |
| NthMadagascar | -0.143 | 0.016  | -0.020 | 0.177   | 0.029     | -0.023 | 0.117     | 0.006   | -0.037  |               |
| SthMadagascar | -0.042 | -0.667 | 0.165  | 0.444   | 0.148     | 0.128  | 0.258     | 0.194   | 0.122   | 0.049         |

Values in bold were significant after Bonferroni correction:  $p < 0.0009$ .
