# Supplementary material for: Phylogeography of the Crown-of-Thorns Starfish in the Indian Ocean
Source: PLoS One. 2012 Aug 21;7(8):e43499. doi: 10.1371/journal.pone.0043499 (PMC3424128; doi:10.1371/journal.pone.0043499)
Supplement: Table S2 — Run conditions for the BEAST Bayesian Skyline analysis for both the Northern and the Southern Indian Ocean sister-species. (PDF) [file pone.0043499.s007.pdf]

**Table S2.**

|                       | COI                          | CR                               |
|-----------------------|------------------------------|----------------------------------|
| Mutation model        | SDR06                        | HKY+G+I                          |
| Molecular clock model | Strict                       | Relaxed uncorrelated logarithmic |
| Rate                  | 1.85±0.4% .Myr <sup>-1</sup> | Estimated from COI               |
| Tree prior            |                              | Bayesian skyline                 |
| Number of groups      |                              | 10                               |
| Skyline model         |                              | Piecewise-linear                 |
| Length of chain       |                              | 10'000'000                       |
| Burn-in               |                              | 1'000'000                        |
